# Supplementary material for: Odd–even effect and metal induced structural convergence in self-assembled monolayers of bipyridine derivatives
Source: Royal Society of Chemistry journal article supplement (doi:10.1039/b616601f), 2007-01-01
Supplement: b616601f.pdf [file b616601f.pdf]

## Electronic Supplementary Information (ESI)

# Odd-even effect and metal induced structural convergence in self-assembled monolayers of bipyridine derivatives

Yoshihiro Kikkawa,<sup>\*a</sup> Emiko Koyama,<sup>\*a</sup> Seiji Tsuzuki,<sup>b</sup> Kyoko Fujiwara,<sup>a</sup> Koji Miyake,<sup>c</sup> Hideo Tokuhisa<sup>a</sup> and Masatoshi Kanosato<sup>a</sup>

<sup>a</sup> Nanoarchitectonics Research Center, National Institute of Advanced Industrial Science and Technology (AIST), Tsukuba Central 4, 1-1-1 Higashi, Tsukuba, Ibaraki, 305-8562, Japan. Fax: +81-29-861-3029; Tel: +81-29-861-2955; E-mail: y.kikkawa@aist.go.jp

<sup>b</sup> Research Institute for Computational Sciences, AIST

<sup>c</sup> Advanced Manufacturing Research Institute, AIST

### 1. Synthetic procedure and spectroscopic characterization data of **bpy** samples

The **bpy** samples used in this study were synthesized by the previous method.<sup>S1</sup> Briefly, the 5,5'-dibromo-2,2'-bipyridine was prepared according to the reported method.<sup>S2</sup> Then, the compound was reacted with trimethylsilylacetylene to obtain the 5,5'-diethynyl-2,2'-bipyridine. 1,2-dialkyloxy-4-iodobenzene (n=11-18) was introduced to 5,5'-diethynyl-2,2'-bipyridine so as to prepare the **bpy** (n=11-18). NMR spectra were recorded on a 500 MHz Bruker Avance 500 spectrometer using tetramethylsilane as an internal standard as:

**bpy** (n=11): <sup>1</sup>H NMR (CDCl<sub>3</sub>): δ 0.88 (t, *J* = 6.95 Hz, 12H, -CH<sub>3</sub>), 1.22-1.40 (br, 56H, -CH<sub>2</sub>-), 1.44-1.52 (m, 8H, O-(CH<sub>2</sub>)<sub>2</sub>-CH<sub>2</sub>-), 1.80-1.88 (m, 8H, O-CH<sub>2</sub>-CH<sub>2</sub>-), 4.03 (t, *J* = 6.55 Hz, 8H, O-CH<sub>2</sub>-), 6.85 (d, *J* = 8.40 Hz, 2H, Ar), 7.07 (d, *J* = 1.55 Hz, 2H, Ar), 7.14 (dd, *J*<sub>1</sub> = 8.23 Hz, *J*<sub>2</sub> = 1.35 Hz, 2H, Ar), 7.92 (d, *J* = 4.30 Hz, 2H, Ar), 8.41 (brs, 2H, Ar), 8.79 (brs, 2H, Ar).

**bpy** (n=12): <sup>1</sup>H NMR (CDCl<sub>3</sub>): δ 0.88 (t, *J* = 6.80 Hz, 12H, -CH<sub>3</sub>), 1.22-1.40 (br, 64H, -CH<sub>2</sub>-), 1.44-1.52 (m, 8H, O-(CH<sub>2</sub>)<sub>2</sub>-CH<sub>2</sub>-), 1.80-1.87 (m, 8H, O-CH<sub>2</sub>-CH<sub>2</sub>-), 4.03 (t, *J* = 6.55 Hz, 8H, O-CH<sub>2</sub>-), 6.85 (d, *J* = 8.35 Hz, 2H, Ar), 7.07 (d, *J* = 1.85 Hz, 2H, Ar), 7.14 (dd, *J*<sub>1</sub> = 8.25 Hz, *J*<sub>2</sub> = 1.85 Hz, 2H, Ar), 7.91 (d, *J* = 8.10 Hz, 2H, Ar), 8.41 (d, *J* = 7.65 Hz, 2H, Ar), 8.79 (brs, 2H, Ar).

**bpy** (n=13):  $^1\text{H}$  NMR ( $\text{CDCl}_3$ ):  $\delta$  0.88 (t,  $J = 6.80$  Hz, 12H,  $-\text{CH}_3$ ), 1.22-1.40 (br, 72H,  $-\text{CH}_2-$ ), 1.44-1.52 (m, 8H,  $\text{O}-(\text{CH}_2)_2-\text{CH}_2-$ ), 1.80-1.87 (m, 8H,  $\text{O}-\text{CH}_2-\text{CH}_2-$ ), 4.03 (t,  $J = 6.55$  Hz, 8H,  $\text{O}-\text{CH}_2-$ ), 6.85 (d,  $J = 8.40$  Hz, 2H, Ar), 7.07 (d,  $J = 2.00$  Hz, 2H, Ar), 7.14 (dd,  $J_1 = 8.25$  Hz,  $J_2 = 1.85$  Hz, 2H, Ar), 7.91 (dd,  $J_1 = 8.25$  Hz,  $J_2 = 2.15$  Hz, 2H, Ar), 8.41 (d,  $J = 8.25$  Hz, 2H, Ar), 8.79 (s, 2H, Ar).

**bpy** (n=14):  $^1\text{H}$  NMR ( $\text{CDCl}_3$ ):  $\delta$  0.88 (t,  $J = 6.88$  Hz, 12H,  $-\text{CH}_3$ ), 1.22-1.40 (br, 80H,  $-\text{CH}_2-$ ), 1.44-1.52 (m, 8H,  $\text{O}-(\text{CH}_2)_2-\text{CH}_2-$ ), 1.80-1.87 (m, 8H,  $\text{O}-\text{CH}_2-\text{CH}_2-$ ), 4.03 (t,  $J = 6.70$  Hz, 8H,  $\text{O}-\text{CH}_2-$ ), 6.85 (d,  $J = 8.40$  Hz, 2H, Ar), 7.07 (d,  $J = 1.80$  Hz, 2H, Ar), 7.14 (dd,  $J_1 = 8.23$  Hz,  $J_2 = 1.85$  Hz, 2H, Ar), 7.91 (dd,  $J_1 = 8.23$  Hz,  $J_2 = 2.15$  Hz, 2H, Ar), 8.41 (d,  $J = 8.25$  Hz, 2H, Ar), 8.79 (s, 2H, Ar).

**bpy** (n=15):  $^1\text{H}$  NMR ( $\text{CDCl}_3$ ):  $\delta$  0.88 (t,  $J = 6.80$  Hz, 12H,  $-\text{CH}_3$ ), 1.23-1.42 (br, 88H,  $-\text{CH}_2-$ ), 1.44-1.52 (m, 8H,  $\text{O}-(\text{CH}_2)_2-\text{CH}_2-$ ), 1.80-1.87 (m, 8H,  $\text{O}-\text{CH}_2-\text{CH}_2-$ ), 4.03 (t,  $J = 6.55$  Hz, 8H,  $\text{O}-\text{CH}_2-$ ), 6.85 (d,  $J = 8.35$  Hz, 2H, Ar), 7.07 (d,  $J = 1.85$  Hz, 2H, Ar), 7.14 (dd,  $J_1 = 8.25$  Hz,  $J_2 = 1.85$  Hz, 2H, Ar), 7.91 (dd,  $J_1 = 8.25$  Hz,  $J_2 = 2.00$  Hz, 2H, Ar), 8.41 (d,  $J = 8.25$  Hz, 2H, Ar), 8.79 (s, 2H, Ar).

**bpy** (n=16):  $^1\text{H}$  NMR ( $\text{CDCl}_3$ ):  $\delta$  0.88 (t,  $J = 6.78$  Hz, 12H,  $-\text{CH}_3$ ), 1.23-1.42 (br, 96H,  $-\text{CH}_2-$ ), 1.44-1.52 (m, 8H,  $\text{O}-(\text{CH}_2)_2-\text{CH}_2-$ ), 1.80-1.87 (m, 8H,  $\text{O}-\text{CH}_2-\text{CH}_2-$ ), 4.03 (t,  $J = 6.55$  Hz, 8H,  $\text{O}-\text{CH}_2-$ ), 6.85 (d,  $J = 8.50$  Hz, 2H, Ar), 7.07 (d,  $J = 1.85$  Hz, 2H, Ar), 7.14 (dd,  $J_1 = 8.30$  Hz,  $J_2 = 1.65$  Hz, 2H, Ar), 7.92 (dd,  $J_1 = 8.25$  Hz,  $J_2 = 2.00$  Hz, 2H, Ar), 8.41 (brs, 2H, Ar), 8.79 (brs, 2H, Ar).

**bpy** (n=17):  $^1\text{H}$  NMR ( $\text{CDCl}_3$ ):  $\delta$  0.88 (t,  $J = 6.88$  Hz, 12H,  $-\text{CH}_3$ ), 1.23-1.38 (br, 104H,  $-\text{CH}_2-$ ), 1.44-1.52 (m, 8H,  $\text{O}-(\text{CH}_2)_2-\text{CH}_2-$ ), 1.78-1.87 (m, 8H,  $\text{O}-\text{CH}_2-\text{CH}_2-$ ), 4.03 (t,  $J = 6.55$  Hz, 8H,  $\text{O}-\text{CH}_2-$ ), 6.85 (d,  $J = 8.40$  Hz, 2H, Ar), 7.07 (d,  $J = 1.85$  Hz, 2H, Ar), 7.14 (dd,  $J_1 = 8.08$  Hz,  $J_2 = 1.85$  Hz, 2H, Ar), 7.92 (d,  $J = 8.25$  Hz, Hz, 2H, Ar), 8.41 (brs, 2H, Ar), 8.78 (brs, 2H, Ar).

**bpy** (n=18):  $^1\text{H}$  NMR ( $\text{CDCl}_3$ ):  $\delta$  0.88 (t,  $J = 6.88$  Hz, 12H,  $-\text{CH}_3$ ), 1.21-1.38 (br, 112H,  $-\text{CH}_2-$ ), 1.44-1.52 (m, 8H,  $\text{O}-(\text{CH}_2)_2-\text{CH}_2-$ ), 1.78-1.87 (m, 8H,  $\text{O}-\text{CH}_2-\text{CH}_2-$ ), 4.03 (t,  $J = 6.55$  Hz, 8H,  $\text{O}-\text{CH}_2-$ ), 6.85 (d,  $J = 8.55$  Hz, 2H, Ar), 7.07 (d,  $J = 1.70$  Hz, 2H, Ar), 7.14 (dd,  $J_1 = 8.30$  Hz,  $J_2 = 1.80$  Hz, 2H, Ar), 7.92 (d,  $J = 7.75$  Hz, Hz, 2H, Ar), 8.41 (brs, 2H, Ar), 8.78 (brs, 2H, Ar).

S1 Y. Kikkawa, E. Koyama, S. Tsuzuki, K. Fujiwara, K. Miyake, H. Tokuhisa, M. Kanosato, *Langmuir*, 2006, **22**, 6910.

S2 S. Oae, T. Kawai, N. Furukawa, *Phosphorus Sulfur Relat. Elm.*, 1987, **34**, 123.

## 2. Thermal data

Melting temperature of bulk **bpy** samples was evaluated by DSC (EXSTAR6000, Seiko Instruments Inc.). The bulk sample of ca. 2 mg was encapsulated in the aluminum pans and heated from 90 to 150 °C at a heating rate of 2 °C/min. The onset melting temperatures were plotted as a function of the number of carbon atoms in the peripheral alkyl chains (Fig. S1). The onset melting temperature of odd **bpy** (n=11, 13, 15) and even one (n=12, 14, 16) was linearly reduced, respectively, as the carbon numbers in the alkyl chains were increased. The **bpy** (n=17) and **bpy** (n=18) were deviated from the above relations. Therefore, it is conceivable that **bpy** (n=17) and **bpy** (n=18) have a different crystalline packing structure compared with **bpy** (n=11-16). In addition, **bpy** (n=18) shows the two melting endothermic peaks, suggesting that **bpy** (n=18) has at least two crystalline states.

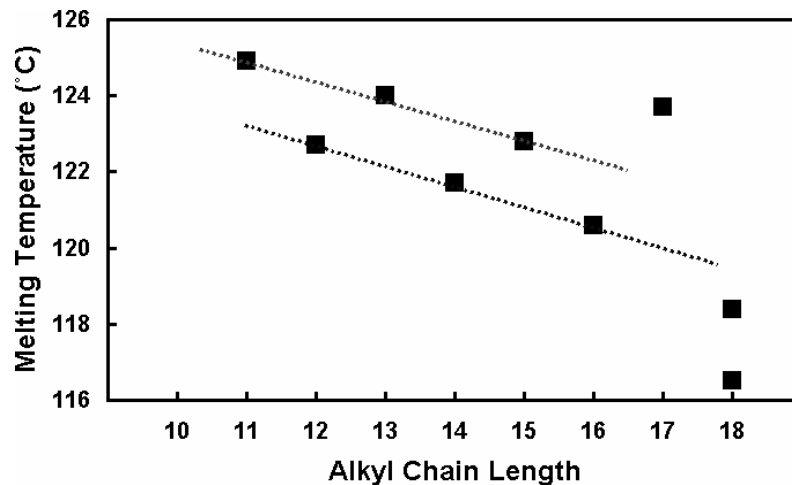

**Fig. S1.** Plots of onset melting temperature vs. the number of carbon atoms in the peripheral alkyl chains of **bpy**.

### 3. Additional STM images of **bpy** before and after metal coordination

The monolayers of **bpy** ( $n=12, 13, 15, 16$ ) at HOPG/1-phenyloctane interface was observed by STM, and the images are shown in Fig. S2. After metal coordination, STM observation was performed in the monolayers of **bpy** ( $n=11, 12, 13, 15, 16, 18$ ), and the images are shown in Fig. S3.

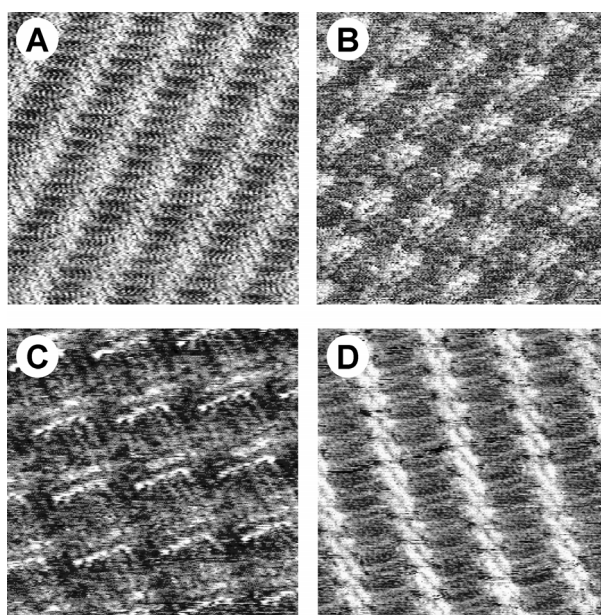

**Fig. S2** STM images ( $15 \text{ nm} \times 15 \text{ nm}$ ) of **bpy** with odd and even number of carbon atoms in the alkyl chains. (A)  $n = 12$ , (B)  $n=13$ , (C)  $n=15$ , (D)  $n=16$ .

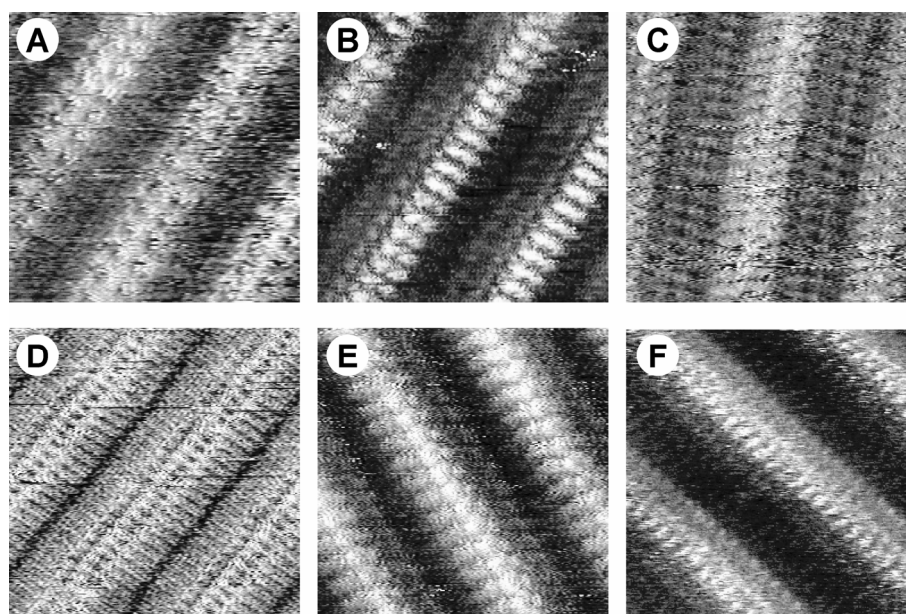

**Fig. S3** STM images ( $15 \text{ nm} \times 15 \text{ nm}$ ) of **bpy** after metal coordination. (A)  $n=11$ , (B)  $n=12$ , (C)  $n=13$ , (D)  $n=15$ , (E)  $n=16$ , (F)  $n=18$ .

#### 4. Large area STM images of **bpy** (n=18)

Fig. S4 shows the large area STM images of **bpy** (n=18) at HOPG/1-phenyloctane interface. Figs. 2B-2D were enlarged images of Fig. S4.

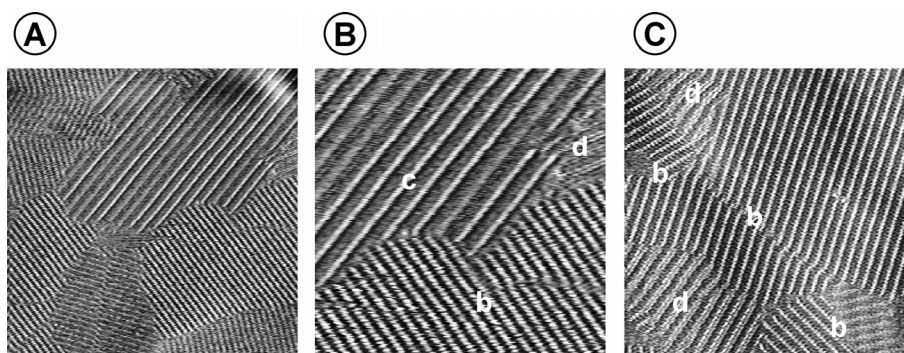

**Fig. S4** STM images (A: 200 nm  $\times$  200 nm, B and C: 100 nm  $\times$  100 nm) of **bpy** (n=18). The white symbols (b-c) in the image indicate the two-dimensional patterns found in Figs. 2B-2D, respectively.

#### 5. Intermolecular distance at the $\pi$ -conjugated units

The periodical length between the  $\pi$ -conjugated units before (Figs. 1, 2 and S2) and after metal coordination (Figs. 3 and S3) was measured from STM images. The data are listed in Table S1. The distance between the neighboring  $\pi$ -conjugated units after metal coordination was larger than that of bare **bpy**.

**Table S1.** Measured intermolecular distances between the  $\pi$  coordinated units.

| bpy (n) | Intermolecular distance ( $\text{\AA}$ ) |                              |
|---------|------------------------------------------|------------------------------|
|         | bare <b>bpy</b>                          | metal coordinated <b>bpy</b> |
| 11      | $7.5 \pm 0.6$                            | $10.4 \pm 0.6$               |
| 12      | $8.0 \pm 0.4$                            | $9.9 \pm 0.4$                |
| 13      | $7.8 \pm 0.8$                            | $10.3 \pm 0.5$               |
| 14      | $7.5 \pm 0.6$                            | $10.4 \pm 0.3$               |
| 15      | $7.8 \pm 0.7$                            | $9.5 \pm 0.3$                |
| 16      | $7.9 \pm 0.4$                            | $9.6 \pm 0.5$                |
| 17      | $7.6 \pm 0.4$                            | $9.5 \pm 0.3$                |
| 18      | $7.7 \pm 0.5$                            | $10.3 \pm 0.5$               |
| Average | $7.6 \pm 0.6$                            | $10.0 \pm 0.4$               |
